# Supplementary material for: In Vitro Cartilage Regeneration with a Three-Dimensional Polyglycolic Acid (PGA) Implant in a Bovine Cartilage Punch Model
Source: MDPI journal article supplement (doi:10.3390/ijms222111769), 2021-10-29
Supplement: s1 [file s1]

## Supplementary Material

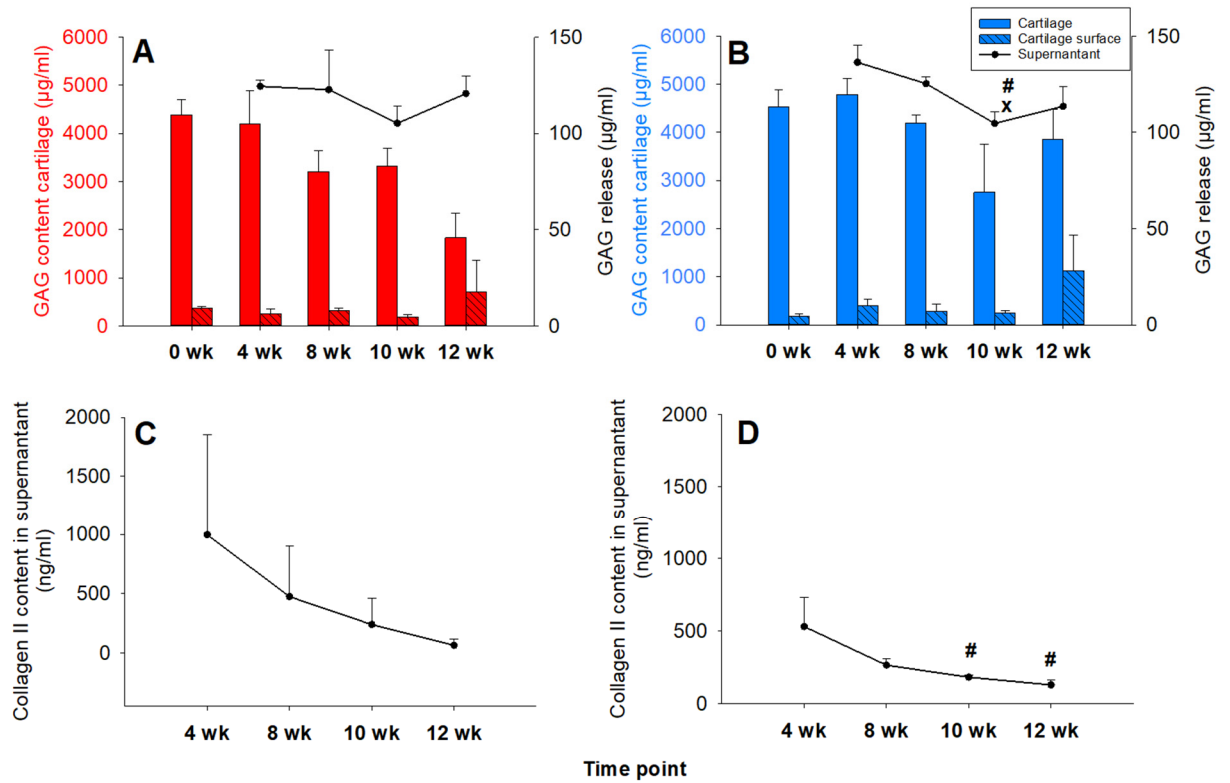

**Figure S1.** Quantitation of proteoglycan content or liberation (DMB assay) or newly produced collagen 2 (ELISA) in cartilage/PGA-hybrids (cell-free or cell-loaded PGA). Levels of proteoglycans or newly produced collagen 2 were analyzed in fresh and cultured 'host' cartilage (cartilage), cells on the surface of the cartilage (cartilage surface), and supernatant (supernatant), using either cell-free (A for proteoglycan; C for collagen 2) or cell-loaded PGA (B for proteoglycan; D for collagen 2); means  $\pm$  SEM; symbols show  $p \leq 0.05$  versus # 4 weeks; x 8 weeks.
